# Supplementary material for: Enhanced sorption of the UV filter 4-methylbenzylidene camphor on aged PET microplastics from both experimental and theoretical perspectives
Source: Royal Society of Chemistry journal article supplement (doi:10.1039/d1ra05013c), 2021-01-01
Supplement: d1ra05013c1.pdf [file d1ra05013c1.pdf]

## Supplementary Information

### Enhanced sorption of the UV filter 4-methylbenzylidene camphor on aged PET microplastics from both experimental and theoretical perspectives

Chun-Yu Shih<sup>a</sup>, Yu-Hsiang Wang<sup>a</sup>, Yi-Ju Chen<sup>a</sup>, Hsin-An Chen<sup>b</sup>, Angela Yu-Chen Lin<sup>a\*</sup>

<sup>a</sup>Graduate Institute of Environmental Engineering, National Taiwan University, 71-Chou-Shan Road, Taipei 106, Taiwan, ROC

<sup>b</sup>Department of Materials and Mineral Resources, National Taipei University of Technology, 1, Sec. 3, Zhong-Xiao E. Rd., Taipei 106, Taiwan, ROC

(\* corresponding author: Angela Yu-Chen Lin [yuchenlin@ntu.edu.tw](mailto:yuchenlin@ntu.edu.tw), Tel: +886-2-3366-4386)

**Number of Pages: 13**

**Number of Tables: 10**

**Number of Figures: 8**

## Table of Content

|                                                                                                                                                                                                                                                                                                                                                                    |    |
|--------------------------------------------------------------------------------------------------------------------------------------------------------------------------------------------------------------------------------------------------------------------------------------------------------------------------------------------------------------------|----|
| <b>Text S1. Climate conditions for outdoor experiments</b> .....                                                                                                                                                                                                                                                                                                   | 3  |
| Table S1. Climate information for the GIEE building in Taipei.....                                                                                                                                                                                                                                                                                                 | 3  |
| Table S2. Climate information for Yilan .....                                                                                                                                                                                                                                                                                                                      | 4  |
| <b>Text S2. LC-MS/MS conditions</b> .....                                                                                                                                                                                                                                                                                                                          | 4  |
| Table S3. LC-MS/MS gradient for 4-MBC analysis.....                                                                                                                                                                                                                                                                                                                | 5  |
| Table S4. Mass spectrometry parameters of 4-MBC in the LC-MS/MS system. ....                                                                                                                                                                                                                                                                                       | 5  |
| <b>Text S3. Data analysis of sorption experiment</b> .....                                                                                                                                                                                                                                                                                                         | 5  |
| Figure S1. Physicochemical properties of 4-MBC.....                                                                                                                                                                                                                                                                                                                | 7  |
| Figure S2. Scheme of the sorption experiment .....                                                                                                                                                                                                                                                                                                                 | 7  |
| Figure S3. Experimental setup for a homemade aging system equipped with UVC lamps (254 nm) .....                                                                                                                                                                                                                                                                   | 8  |
| Figure S4. Langmuir and Freundlich isotherm plots for the sorption of (a) PET and (b) aged PET microplastics with 4-MBC .....                                                                                                                                                                                                                                      | 8  |
| Figure S5. Sorption isotherm of 4-MBC on PET microplastics with the linear isotherm model: (a) Freundlich (b) Langmuir .....                                                                                                                                                                                                                                       | 9  |
| Figure S6. FTIR spectra of Bot-PET for 0, 3, 6, 9, and 12 months.....                                                                                                                                                                                                                                                                                              | 9  |
| Figure S7. Sorption kinetics of virgin and aged PE and PP microplastics with 4-MBC over 27 h ( $[4\text{-MBC}]_0 = 50$ ppb, $[\text{microplastics}]_0 = 100$ mg, temperature = 20 °C, initial pH = 7, salinity = 0.) .....                                                                                                                                         | 10 |
| Figure S8. Sorption capacity of virgin and aged PE and PP microplastics for 4-MBC (a) at different pH values and (b) in the presence of salinity. ( $[4\text{-MBC}]_0 = 50$ ppb, $[\text{microplastics}]_0 = 100$ mg, temperature = 20 °C, initial pH = 7 (with the exception of the control pH), salinity = 0 (with the exception of the salinity effect).) ..... | 10 |
| Table S5. XPS data of virgin and aged PET microplastics. ....                                                                                                                                                                                                                                                                                                      | 11 |
| Table S6. Regression parameters for the sorption kinetics of 4-MBC on PET microplastics with pseudo-first order and pseudo-second order models.....                                                                                                                                                                                                                | 11 |
| Table S7. Activation energy of the 4-MBC sorption process onto PET microplastics .....                                                                                                                                                                                                                                                                             | 11 |
| Table S8. Binding energy of functional groups with 4-MBC by DFT.....                                                                                                                                                                                                                                                                                               | 12 |
| Table S9. $\text{pH}_{\text{PZC}}$ of virgin and aged microplastics .....                                                                                                                                                                                                                                                                                          | 12 |
| Table S10. Sorption capacity of Bot-PET and Env-PET for 4-MBC ( $[4\text{-MBC}]_0 = 50$ ppb, $[\text{microplastics}]_0 = 100$ mg, temperature = 20 °C, initial pH = 7 and salinity = 0.).....                                                                                                                                                                      | 12 |
| <b>References</b> .....                                                                                                                                                                                                                                                                                                                                            | 13 |

## Text S1. Climate conditions for outdoor experiments

Bot-PET samples were placed on the roof of the Graduate Institute of Environmental Engineering (GIEE) building (GPS coordinates: 25.0180, 121.5433; Taiwan) and climate information about the sampling site is shown in Table S1.

Table S1. Climate information for the GIEE building in Taipei

| Taipei                                | 2019.04 | 2019.05 | 2019.06 | 2019.07 | 2019.08 | 2019.09 | 2019.10 | 2019.11 | 2019.12 | 2020.01 | 2020.02 | 2020.03 |
|---------------------------------------|---------|---------|---------|---------|---------|---------|---------|---------|---------|---------|---------|---------|
| Average Temp. (°C)                    | 24.2    | 25      | 28.5    | 30.3    | 30.5    | 27.3    | 25.3    | 22      | 19.1    | 17.9    | 18.7    | 20.8    |
| Relative Humidity (%)                 | 76      | 77      | 77      | 73      | 72      | 79      | 74      | 75      | 77      | 75      | 72      | 75      |
| Sunshine hours (hr)                   | 105     | 80      | 91      | 146     | 187     | 160     | 139     | 103     | 81      | 113     | 126     | 87      |
| Solar Irradiance (MJ/m <sup>2</sup> ) | 340     | 331     | 381     | 490     | 515     | 479     | 403     | 324     | 255     | 306     | 364     | 365     |
| Precipitation (mm)                    | 115     | 335     | 419     | 439     | 212     | 377     | 27      | 13      | 136     | 39      | 30      | 246     |

The Env-PET sample was a PET bottle collected on a beach in Yilan, Taiwan (GPS coordinates: 24.8567, 121.8327; Taiwan), in February 2019, and climate information about the sampling site is shown in Table S2.

Table S2. Climate information for Yilan

| Yilan                                 | 2018.03 | 2018.04 | 2018.05 | 2018.06 | 2018.07 | 2018.08 | 2018.09 | 2018.10 | 2018.11 | 2018.12 | 2019.01 | 2019.02 |
|---------------------------------------|---------|---------|---------|---------|---------|---------|---------|---------|---------|---------|---------|---------|
| Average Temp. (°C)                    | 20.5    | 22.6    | 27      | 27.8    | 29.2    | 29.1    | 27.7    | 22.8    | 22      | 19.3    | 18.4    | 19.4    |
| Relative Humidity (%)                 | 72      | 74      | 76      | 79      | 75      | 76      | 77      | 77      | 87      | 85      | 84      | 85      |
| Sunshine hours (hr)                   | 149     | 108     | 191     | 144     | 212     | 187     | 170     | 76      | 65      | 103     | 62      | 66      |
| Solar Irradiance (MJ/m <sup>2</sup> ) | 478     | 426     | 623     | 550     | 669     | 621     | 521     | 277     | 231     | 239     | 215     | 253     |
| Precipitation (mm)                    | 40      | 26      | 33      | 245     | 92      | 145     | 165     | 535     | 436     | 307     | 447     | 56      |

### Text S2. LC-MS/MS conditions

The concentrations of target compounds in experimental samples were analyzed by liquid chromatography-tandem mass spectrometry (LC-MS/MS) with an Agilent 1200 liquid chromatograph (Agilent, Palo Alto, CA, USA) equipped with a ZORBAX Eclipse XDB-C<sub>18</sub> column (150 × 4.6 mm, 5 μm pore size). A binary gradient with a flow rate of 0.9 mL/min was used. Mobile phase A was composed of 0.1% (v/v) formic acid in Milli-Q water, and mobile phase B was composed of 0.1% (v/v) formic acid with methanol. The mobile phase gradient and mass spectrometer conditions for mass spectral analysis is shown in

Table S3-4.

Table S3. LC-MS/MS gradient for 4-MBC analysis

| ESI: positive mode                             |                    |       |       |
|------------------------------------------------|--------------------|-------|-------|
| Mobile Phase A: 0.1% formic acid (v/v) in DI   |                    |       |       |
| Mobile Phase B: 0.1% formic acid (v/v) in MeOH |                    |       |       |
| Time (min)                                     | Flow rate (mL/min) | A (%) | B (%) |
| 0                                              | 0.9                | 95    | 5     |
| 0.5                                            | 0.9                | 95    | 5     |
| 1.5                                            | 0.9                | 5     | 95    |
| 5                                              | 0.9                | 5     | 95    |
| 5.5                                            | 0.9                | 95    | 5     |
| 8.5                                            | 0.9                | 95    | 5     |

Table S4. Mass spectrometry parameters of 4-MBC in the LC-MS/MS system.

| Compound | Retention time (min) | Precursor ion (m/z)     | DP (Volt) | Quantitation      |           |            | Confirmation      |           |            |
|----------|----------------------|-------------------------|-----------|-------------------|-----------|------------|-------------------|-----------|------------|
|          |                      |                         |           | Product ion (m/z) | CE (Volt) | CXP (Volt) | Product ion (m/z) | CE (Volt) | CXP (Volt) |
| 4-MBC    | 5.56                 | [M+H] <sup>+</sup> =255 | 18.5      | 105               | 25        | 10.5       | 157               | 25        | 11.5       |

Sample injection was carried out by the autosampler with a 20  $\mu$ L injection volume at room temperature.

Mass spectra were acquired using a SCIEX API 4000 mass spectrometer (Applied Biosystems, Foster City, CA, USA) that was equipped with an electrospray ionization (ESI) interface. Multiple reaction monitoring (MRM) mode was used to acquire secondary mass spectra with a dwell time of 50 ms and unit mass resolution by MS/MS. The quantitation of 4-MBC was reported for the mass transition of  $m/z$  255  $\rightarrow$  105.

### Text S3. Data analysis of sorption experiment

The pseudo-first-order<sup>1</sup> and pseudo-second-order<sup>2</sup> models were used to fit the sorption kinetic data.

$$\text{Pseudo-first-order equation: } \ln(q_e - q_t) = \ln q_e - k_1 t \text{ eq.} \quad (1)$$

Pseudo-second-order equation: 
$$\frac{t}{q_t} = \frac{1}{k_2 q_e^2} + \frac{1}{q_e} t \quad \text{eq.} \quad (2)$$

For the pseudo-first-order equation, the formula can be plotted as  $t$  vs  $\ln(q_e - q_t)$ , where the slope is  $k_1$ ,  $q_e$  (mg/g) and  $q_t$  (mg/g) are the sorption capacity at equilibrium and at time  $t$ , respectively, and  $k_1$  (1/h) is the reaction rate constant of the pseudo-first-order model. For the pseudo-second order equation, the formula can be plotted as  $t$  vs  $\frac{t}{q_t}$ , where the slope is  $\frac{1}{q_e}$ ,  $q_e$  (mg/g) and  $q_t$  (mg/g) are the sorption capacity at equilibrium and at time  $t$ , respectively, and  $k_2$  (g/mg·h) is the reaction rate constant for the pseudo-second order model.

Sorption isotherms of 4-MBC on microplastics were established by the Langmuir<sup>3</sup> and Freundlich<sup>4</sup> models.

Langmuir model: 
$$q_e = \frac{q_m \cdot K_L \cdot C_e}{1 + K_L \cdot C_e} \quad \text{eq.} \quad (3)$$

Freundlich model: 
$$q_e = K_F \cdot (C_e)^n \quad \text{eq.} \quad (4)$$

where  $q_e$  (mg/g) is the concentration of 4-MBC adsorbed onto the microplastics at equilibrium,  $C_e$  (mg/L) is the residual aqueous concentration of 4-MBC at equilibrium,  $q_m$  is the total number of surface sites per mass of sorbent, which is usually the same as  $C_{is,max}$ ,  $K_L$  and  $K_F$  are the Langmuir and Freundlich isotherm coefficients, respectively, and  $n$  is the Freundlich exponent, which is often applied as an indicator of isotherm nonlinearity.

Also, the linear form of Langmuir and Freundlich models, shown in Equations (5) and (6), were used to better evaluate the sorption isotherms data.

Langmuir model: 
$$\frac{C_e}{q_e} = \frac{C_e}{q_m} + \frac{1}{q_m K_L} \quad \text{eq.} \quad (5)$$

Freundlich model: 
$$\ln q_e = \frac{1}{n} \ln C_e + \ln K_F \quad \text{eq.} \quad (6)$$

The Arrhenius law <sup>5</sup> was used to fit the sorption activation energy between 4-MBC and the microplastics.

The formula can be derived from

$$\ln \frac{k_2}{k_1} = \frac{-E_a}{R} \left( \frac{1}{T_2} - \frac{1}{T_1} \right) \text{ eq.} \quad (7)$$

where  $T_1$  and  $T_2$  were set at 20 °C and 50 °C, respectively,  $E_a$  (kJ·mole<sup>-1</sup>) is the activation energy,  $K_1$  is the reaction rate constant at 20 °C, and  $K_2$  is the reaction rate constant at 50 °C.

4-methylbenzylidene camphor  
(4-MBC)

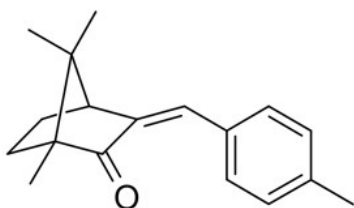

#### Physicochemical Properties

| Molecular mass      | Molecular formula                 |
|---------------------|-----------------------------------|
| 254.4 (g/mol)       | C <sub>18</sub> H <sub>22</sub> O |
| Solubility in water | pKa                               |
| 5.1 mg/L            | -                                 |
| Log Kow             | λ                                 |
| 4.95                | 300 (nm)                          |

Figure S1. Physicochemical properties of 4-MBC

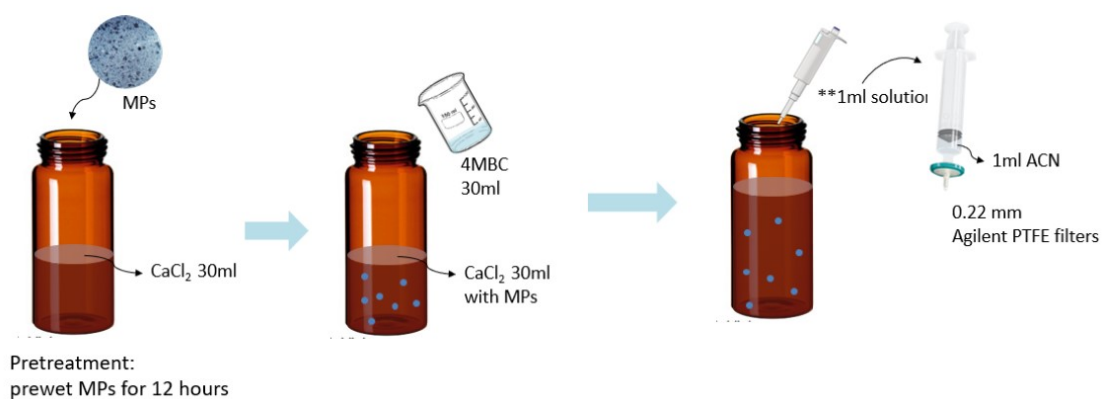

Figure S2. Scheme of the sorption experiment

Operation time: 120 hours

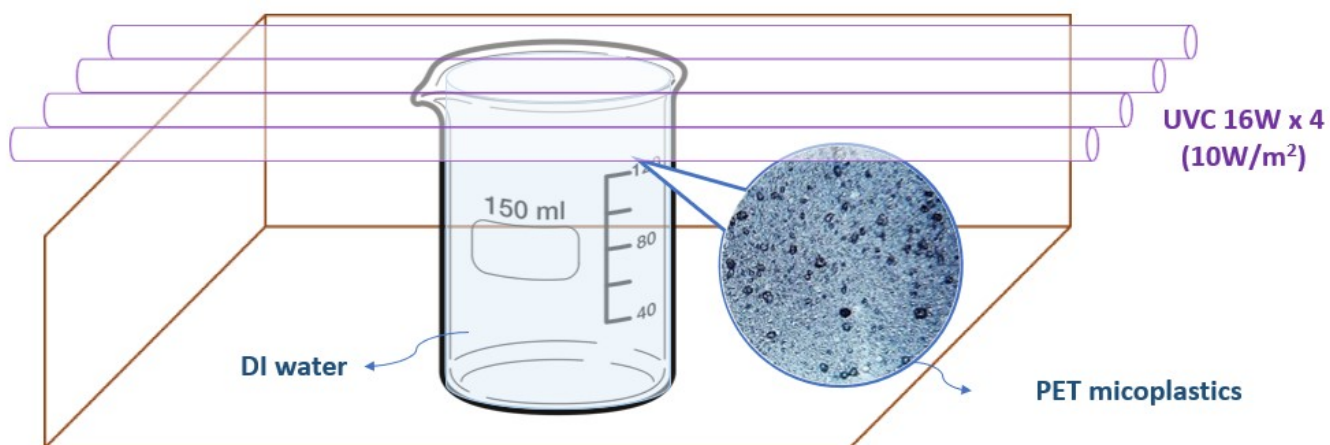

Figure S3. Experimental setup for a homemade aging system equipped with UVC lamps (254 nm)

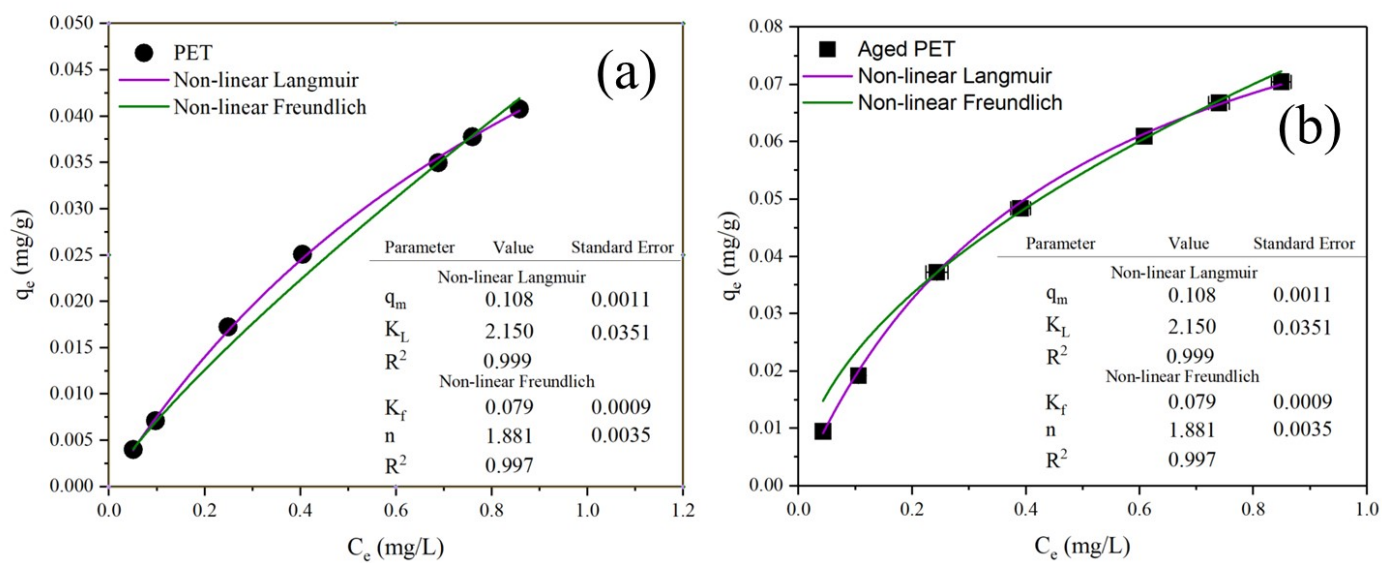

Figure S4. Langmuir and Freundlich isotherm plots for the sorption of (a) PET and (b) aged PET microplastics with 4-MBC



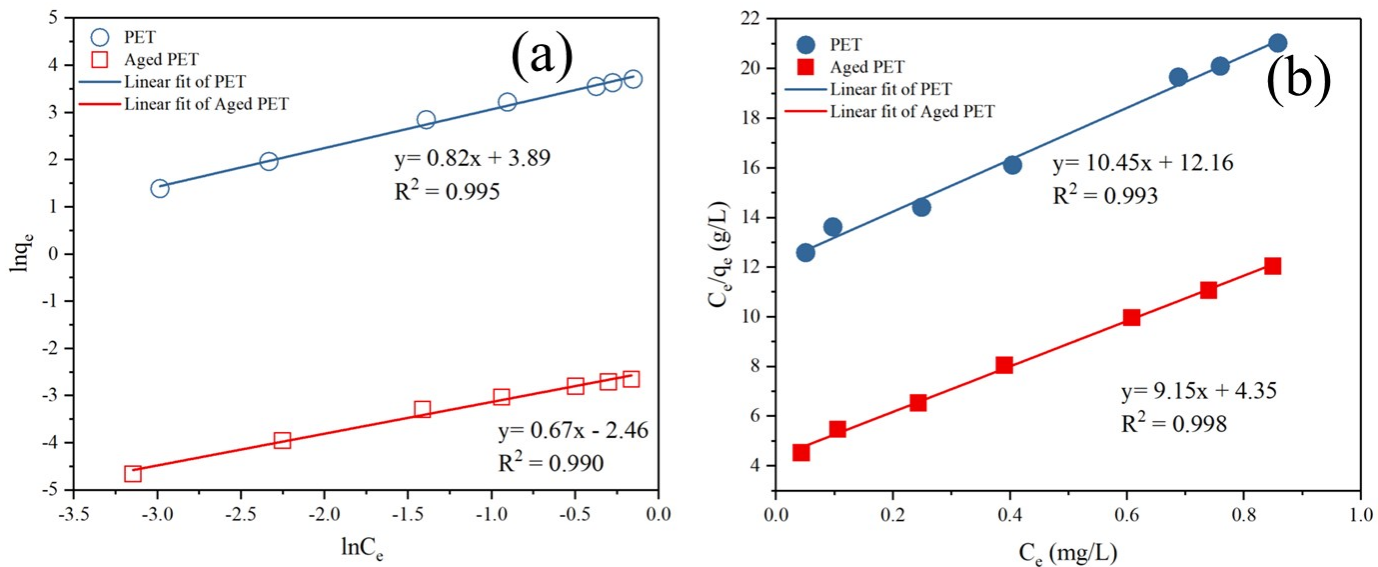

Figure S5. Sorption isotherm of 4-MBC on PET microplastics with the linear isotherm model: (a) Freundlich (b) Langmuir

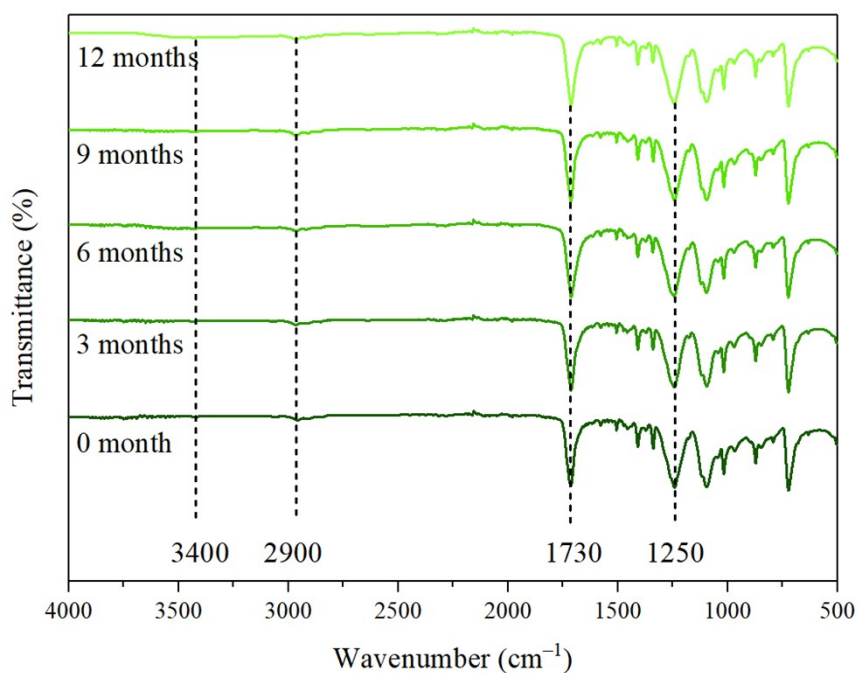

Figure S6. FTIR spectra of Bot-PET for 0, 3, 6, 9, and 12 months

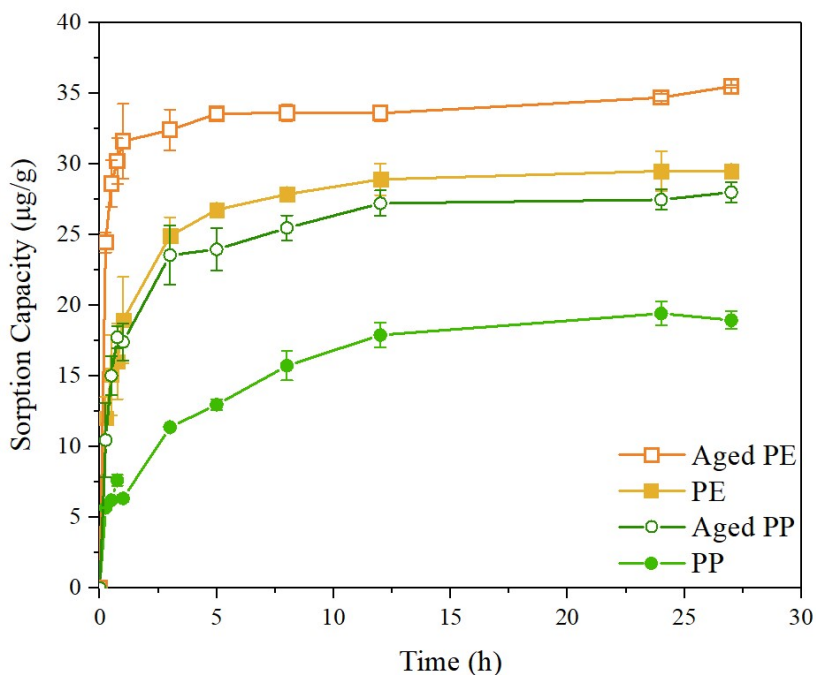

Figure S7. Sorption kinetics of virgin and aged PE and PP microplastics with 4-MBC over 27 h ( $[4\text{-MBC}]_0 = 50$  ppb,  $[\text{microplastics}]_0 = 100$  mg, temperature = 20 °C, initial pH = 7, salinity = 0.)

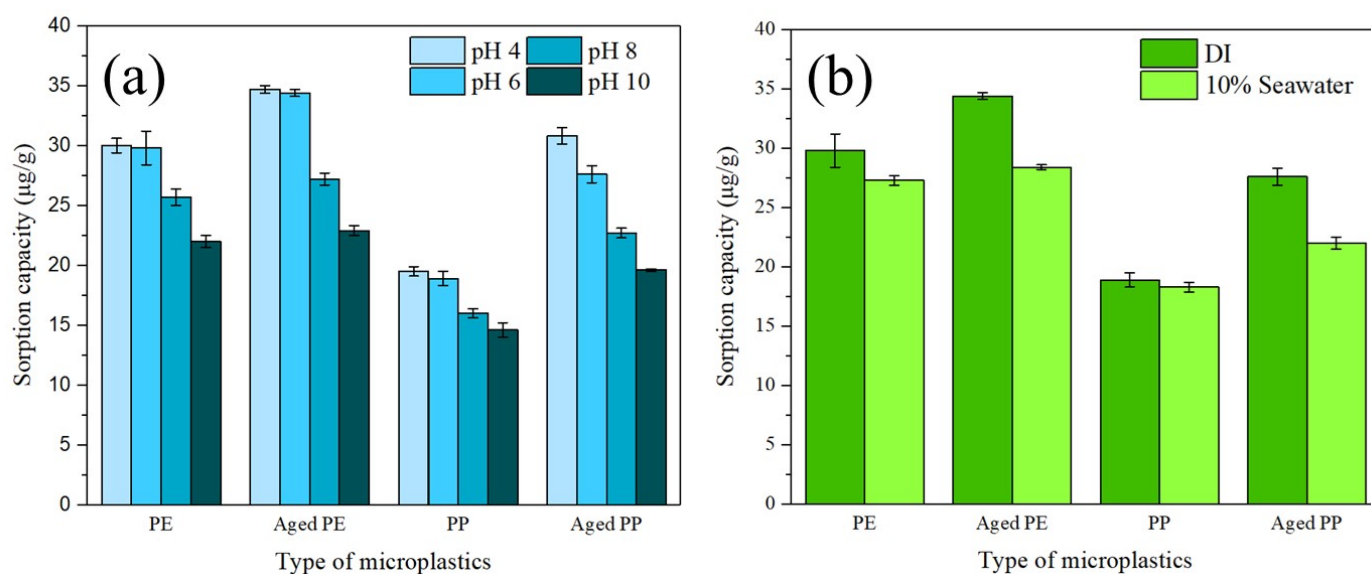

Figure S8. Sorption capacity of virgin and aged PE and PP microplastics for 4-MBC (a) at different pH values and (b) in the presence of salinity. ( $[4\text{-MBC}]_0 = 50$  ppb,  $[\text{microplastics}]_0 = 100$  mg, temperature = 20 °C, initial pH = 7 (with the exception of the control pH), salinity = 0 (with the exception of the salinity effect).)

Table S5. XPS data of virgin and aged PET microplastics.

| Element  | C 1s (%)    |           |      | Total C | Total O | O/C ratio (%) | Carbonyl Index |      |
|----------|-------------|-----------|------|---------|---------|---------------|----------------|------|
|          | Assignments | C-C (C-H) | C-O  |         |         |               |                | C=O  |
| PET      |             | 63.5      | 15.2 | 21.4    | 63.5    | 36.6          | 0.576          | 0.61 |
| Aged PET |             | 61.1      | 16.7 | 22.2    | 61.1    | 38.9          | 0.637          | 0.72 |

Table S6. Regression parameters for the sorption kinetics of 4-MBC on PET microplastics with pseudo-first order and pseudo-second order models.

| Pseudo-First-Order  |                           |                                                |       |
|---------------------|---------------------------|------------------------------------------------|-------|
|                     | $q_e$ ( $\mu\text{g/g}$ ) | $k_1$ (1/hr)                                   | $R^2$ |
| PET                 | $3.20 \pm 0.10$           | $0.10 \pm 0.004$                               | 0.88  |
| Aged PET            | $3.95 \pm 0.50$           | $0.25 \pm 0.045$                               | 0.97  |
| Pseudo-Second-Order |                           |                                                |       |
|                     | $q_e$ ( $\mu\text{g/g}$ ) | $k_2$ ( $\text{g}/\mu\text{g}\cdot\text{hr}$ ) | $R^2$ |
| PET                 | $6.54 \pm 0.92$           | $1.12 \times 10^5 \pm 5.13 \times 10^3$        | 0.99  |
| Aged PET            | $12.33 \pm 0.53$          | $1.34 \times 10^5 \pm 4.10 \times 10^3$        | 0.99  |

Table S7. Activation energy of the 4-MBC sorption process onto PET microplastics

|          | Cal. $q_e$ ( $\mu\text{g/g}$ ) at 20 °C | Cal. $q_e$ ( $\mu\text{g/g}$ ) at 50 °C | k ( $\text{g}/\mu\text{g}\cdot\text{hr}$ ) at 20 °C | k ( $\text{g}/\mu\text{g}\cdot\text{hr}$ ) at 50 °C | Activation Energy (KJ/mole) |
|----------|-----------------------------------------|-----------------------------------------|-----------------------------------------------------|-----------------------------------------------------|-----------------------------|
| PET      | $6.54 \pm 0.92$                         | $5.25 \pm 0.77$                         | $1.12 \times 10^5 \pm 5.13 \times 10^3$             | $3.51 \times 10^5 \pm 1.12 \times 10^4$             | 28.68                       |
| Aged PET | $12.33 \pm 0.53$                        | $6.25 \pm 0.52$                         | $1.34 \times 10^5 \pm 4.10 \times 10^3$             | $2.64 \times 10^5 \pm 1.13 \times 10^4$             | 18.29                       |

Table S8. Binding energy of functional groups with 4-MBC by DFT

|                               | eV           | kJ/mol        |
|-------------------------------|--------------|---------------|
| <b>R-COOH</b><br>(Carboxylic) | <b>-0.50</b> | <b>-47.73</b> |
| <b>H<sub>2</sub>O</b>         | <b>-0.27</b> | <b>-26.44</b> |
| <b>RCHO</b><br>(Aldehyde)     | <b>-0.26</b> | <b>-24.79</b> |
| <b>RCOH</b><br>(Alcohol)      | <b>-0.30</b> | <b>-28.53</b> |

Table S9.  $pH_{PZC}$  of virgin and aged microplastics

| $pH_{PZC}$ | PE   | PE   | PP   |
|------------|------|------|------|
| Virgin     | 3.88 | 4.02 | 3.85 |
| Aged       | 3.89 | 4.03 | 3.87 |

Table S10. Sorption capacity of Bot-PET and Env-PET for 4-MBC ( $[4\text{-MBC}]_0 = 50$  ppb,  $[\text{microplastics}]_0 =$

100 mg, temperature = 20 °C, initial pH = 7 and salinity = 0.)

|                                    | Bot-PET       |             |               |             |              | Env-PET |
|------------------------------------|---------------|-------------|---------------|-------------|--------------|---------|
|                                    | Summer months |             | Winter months |             |              | ∣       |
| month                              | 0<br>month    | 3<br>months | 6<br>months   | 9<br>months | 12<br>months | ∣       |
| $q_e$ in DI<br>( $\mu\text{g/g}$ ) | 0.43          | 0.49        | 0.82          | 0.73        | 0.99         | 2.3     |

## References

1. Lagergren, S., Zur theorie der sogenannten adsorption gelöster stoffe. **1898**.
2. Ho, Y.-S.; McKay, G., Pseudo-second order model for sorption processes. *Process biochemistry* **1999**, *34*, (5), 451-465.
3. Langmuir, I., The adsorption of gases on plane surfaces of glass, mica and platinum. *Journal of the American Chemical society* **1918**, *40*, (9), 1361-1403.
4. Freundlich, H., Über die adsorption in lösungen. *Zeitschrift für physikalische Chemie* **1907**, *57*, (1), 385-470.
5. Truhlar, D. G., Interpretation of the activation energy. *Journal of Chemical Education* **1978**, *55*, (5), 309.
